# Supplementary material for: Tetracycline Analogs Inhibit Osteoclast Differentiation by Suppressing MMP-9-Mediated Histone H3 Cleavage
Source: MDPI journal article supplement (doi:10.3390/ijms20164038), 2019-08-19
Supplement: s1 [file s1]

## Tetracycline analogs inhibit osteoclast differentiation by suppressing MMP-9-mediated histone H3 cleavage

Yeojin Kim, Jinman Kim, Hyerim Lee, Woo-Ri Shin, Sheunghun Lee, Jisu Lee, Jae-II Park, Byung Hak Jhun, Yang-Hoon Kim, Sun-Ju Yi, and Kyunghwan Kim

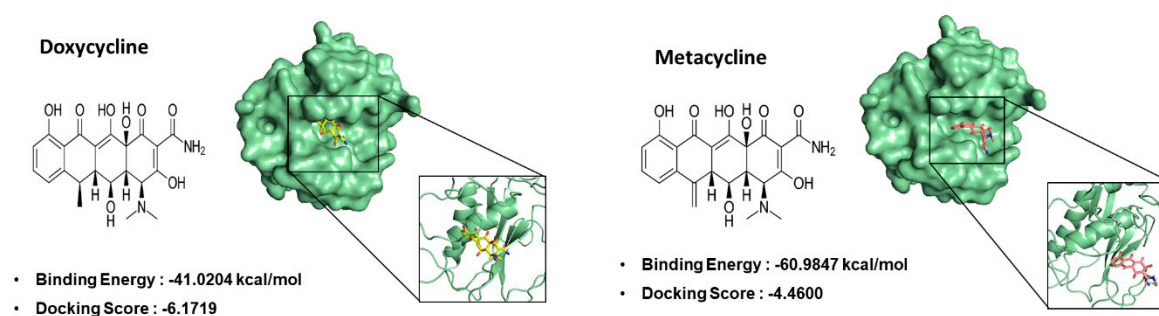

**Figure S1.** Molecular docking analysis of MMP-9 and tetracycline derivatives.

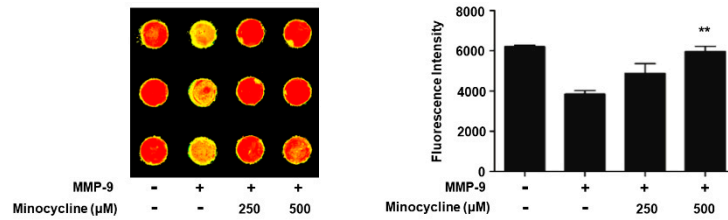

**Figure S2.** Peptide chip assay. Peptide arrays were fabricated by immobilizing TAMRA-Histone H3 peptide onto well-type amine array. Histone cleavage assays were performed as in Material and methods. Results are obtained from three independent experiments. Bars, the mean result  $\pm$  S.D. \*\* $p < 0.001$  relative to H3 peptide treated with only MMP-9.

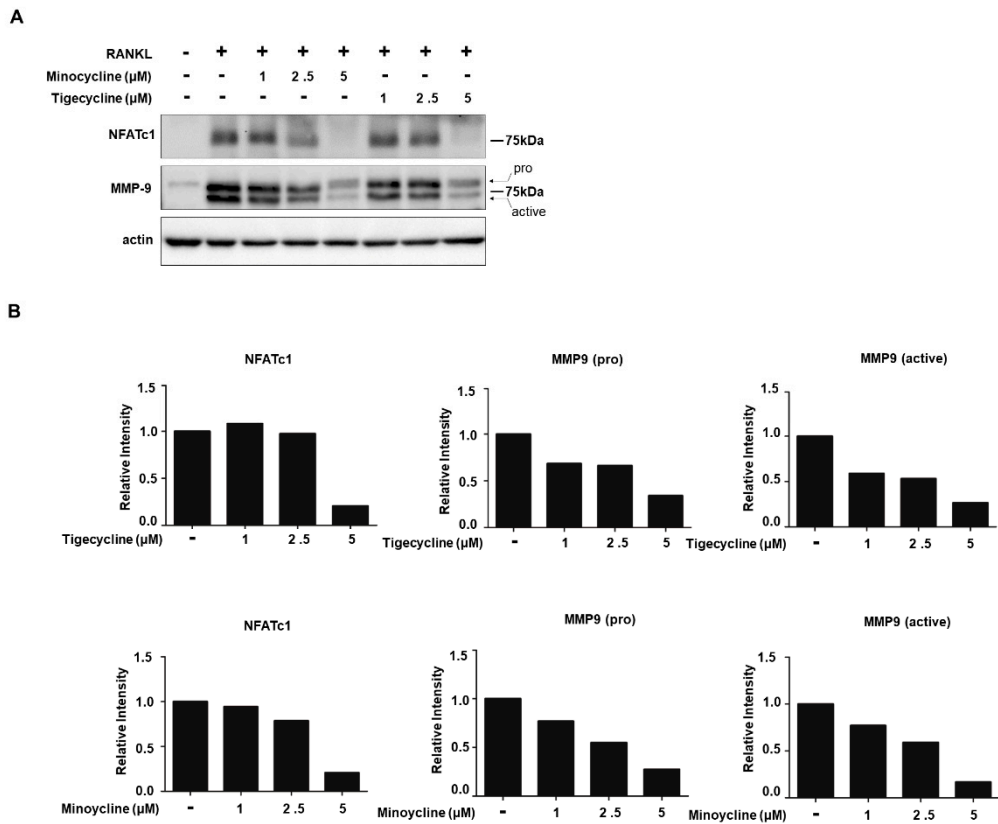

**Figure S3.** Western blot analyses of NFATc1 and MMP-9 after treating with OCP cells with tigecycline and minocycline. (A) BMM cells were pretreated with tigecycline or minocycline and further with RANKL for 3 days. Whole cell lysates were prepared and analyzed by Western blotting with the indicated antibodies.  $\beta$ -actin was used as a loading control. (B) The band intensities of the Western blots were quantified by densitometry.

## Supplementary Materials and Methods

### *Peptide chip analysis*

Well-type amine arrays were prepared by attaching Teflon tape on to silane-coated glass slides (Muto Pure Chemicals, Tokyo, Japan). To make well-type amine arrays containing TAMRA-labeled Histone H3 (aa 14-28), 4.9 mM sulfo-GMBS (ThermoFisher Scientific, Waltham, MA, USA) were dropped into 1.5mm tape hole. After 2h incubation, the arrays were washed with 50 mM sodium bicarbonate buffer (pH 7.0). Then, 1 $\mu$ M of H3 peptide were applied to array wells and further incubated at 37 °C for 1h. To investigate the effect of minocycline on MMP-9-mediated H3 proteolysis, the mixture of MMP-9 with or without minocycline was applied to TAMRA-Histone H3 peptide array and incubate at 37 °C for 1h. Following washing with 0.1% Tween 20 in phosphate buffered saline and with milli-Q-purified water, the arrays were dried and scanned on a GenePix 4000B (Molecular Devices, San Jose, CA, USA) scanner using 532 nm lasers.
